# Supplementary material for: Anticancer Activity of Natural and Synthetic Chalcones
Source: MDPI journal article supplement (doi:10.3390/ijms222111306), 2021-10-20
Supplement: s1 [file s1]

Table S2. Compounds names.

| Comp. | Name                                                                                                                            | Chemical Formula                               |
|-------|---------------------------------------------------------------------------------------------------------------------------------|------------------------------------------------|
| 1     | (E)-3-(4-hydroxy-2-methoxy-5-vinylphenyl)-1-(4-hydroxyphenyl)prop-2-en-1-one                                                    | C <sub>18</sub> H <sub>16</sub> O <sub>4</sub> |
| 2     | (E)-chalcone                                                                                                                    | C <sub>15</sub> H <sub>12</sub> O              |
| 3     | (E)-3-(3,4-dihydroxy-2-methoxyphenyl)-1-(4-hydroxyphenyl)prop-2-en-1-one                                                        | C <sub>16</sub> H <sub>14</sub> O <sub>5</sub> |
| 4     | (E)-3-(4-hydroxy-2-methoxy-3-(3-methylbut-2-en-1-yl)phenyl)-1-(4-hydroxyphenyl)prop-2-en-1-one                                  | C <sub>21</sub> H <sub>22</sub> O <sub>4</sub> |
| 5     | (E)-3-(3,4-dihydroxy-2-methoxyphenyl)-1-(4-hydroxy-3-(3-methylbut-2-en-1-yl)phenyl)prop-2-en-1-one                              | C <sub>21</sub> H <sub>22</sub> O <sub>5</sub> |
| 6     | (E)-1-(2,4-dihydroxy-6-methoxy-3-(3-methylbut-2-en-1-yl)phenyl)-3-(4-hydroxyphenyl)prop-2-en-1-one                              | C <sub>21</sub> H <sub>22</sub> O <sub>5</sub> |
| 7     | (2,6-dihydroxy-4-methoxyphenyl)((1R,2R,3S)-4-methyl-3-(3-methylbut-2-en-1-yl)-1,2,3,6-tetrahydro-[1,1'-biphenyl]-2-yl)methanone | C <sub>26</sub> H <sub>30</sub> O <sub>4</sub> |
| 8     | (E)-1-(2,4-dihydroxy-6-methoxyphenyl)-3-phenylprop-2-en-1-one                                                                   | C <sub>16</sub> H <sub>14</sub> O <sub>4</sub> |
| 9     | 4-hydroxy-5-methoxy-3-(4-methoxyphenyl)-8,8-dimethyl-10-(3-methylbut-2-en-1-yl)-2H,8H-pyran[3,2-g]chromen-2-one                 | C <sub>27</sub> H <sub>28</sub> O <sub>6</sub> |
| 10    | (E)-1-(2,4-dihydroxyphenyl)-3-(3,4-dihydroxyphenyl)prop-2-en-1-one                                                              | C <sub>15</sub> H <sub>12</sub> O <sub>5</sub> |
| 11    | (E)-1-(2,4-dihydroxyphenyl)-3-(4-hydroxyphenyl)prop-2-en-1-one                                                                  | C <sub>15</sub> H <sub>12</sub> O <sub>4</sub> |
| 12    | (E)-1-(2-hydroxy-4,6-dimethoxyphenyl)-3-(4-methoxyphenyl)prop-2-en-1-one                                                        | C <sub>18</sub> H <sub>18</sub> O <sub>5</sub> |
| 13    | (E)-1-(4-hydroxy-3-(2-methylprop-1-en-1-yl)phenyl)-3-(4-hydroxyphenyl)prop-2-en-1-one                                           | C <sub>19</sub> H <sub>18</sub> O <sub>3</sub> |
| 14    | (E)-3-(4-acetylphenyl)-1-(2,4-dihydroxy-6-methoxy-3-(3-methylbut-2-en-1-yl)phenyl)prop-2-en-1-one                               | C <sub>23</sub> H <sub>24</sub> O <sub>5</sub> |
| 15    | (E)-1-(4-acetyl-2-hydroxy-6-methoxy-3-(3-methylbut-2-en-1-yl)phenyl)-3-(4-acetylphenyl)prop-2-en-1-one                          | C <sub>25</sub> H <sub>26</sub> O <sub>5</sub> |
| 16    | (E)-1-(4-(3-(2,4-dihydroxy-6-methoxy-3-(3-methylbut-2-en-1-yl)phenyl)-3-oxoprop-1-en-1-yl)phenyl)decan-1-one                    | C <sub>31</sub> H <sub>40</sub> O <sub>5</sub> |
| 17    | (E)-1-(4-(3-(2,4-dihydroxy-6-methoxy-3-(3-methylbut-2-en-1-yl)phenyl)-3-oxoprop-1-en-1-yl)phenyl)dodecan-1-one                  | C <sub>33</sub> H <sub>44</sub> O <sub>5</sub> |
| 18    | 1-(4-((E)-3-(4-dodecanoylphenyl)acryloyl)-3-hydroxy-5-methoxy-2-(3-methylbut-2-en-1-yl)phenyl)dodeca-2,4,6,8,10-pentaen-1-one   | C <sub>45</sub> H <sub>56</sub> O <sub>5</sub> |
| 19    | (E)-1-(2,4-dihydroxy-6-methoxy-3-(3-methylbut-2-en-1-yl)phenyl)-3-(4-pivaloylphenyl)prop-2-en-1-one                             | C <sub>26</sub> H <sub>30</sub> O <sub>5</sub> |
| 20    | (E)-1-(3-hydroxy-5-methoxy-2-(3-methylbut-2-en-1-yl)-4-(3-(4-pivaloylphenyl)acryloyl)phenyl)-2-methyl-1-oxopropan-2-ide         | C <sub>30</sub> H <sub>35</sub> O <sub>5</sub> |
| 21    | (E)-1-(5-hydroxy-7-methoxy-2,2-dimethyl-2H-chromen-6-yl)-3-(4-hydroxyphenyl)prop-2-en-1-one                                     | C <sub>21</sub> H <sub>20</sub> O <sub>5</sub> |
| 22    | (E)-1-(5-hydroxy-7-methoxy-2,2-dimethylchroman-6-yl)-3-(4-hydroxyphenyl)prop-2-en-1-one                                         | C <sub>21</sub> H <sub>22</sub> O <sub>5</sub> |

|    |                                                                                             |                                                     |
|----|---------------------------------------------------------------------------------------------|-----------------------------------------------------|
| 23 | (E)-1-(5-hydroxy-7-methoxy-2,2-dimethylchroman-8-yl)-3-(4-hydroxyphenyl)prop-2-en-1-one     | C <sub>21</sub> H <sub>22</sub> O <sub>5</sub>      |
| 24 | (E)-1-(5-hydroxy-7-methoxy-2,2-dimethyl-2H-chromen-8-yl)-3-(4-hydroxyphenyl)prop-2-en-1-one | C <sub>21</sub> H <sub>20</sub> O <sub>5</sub>      |
| 25 | 1-(5-hydroxy-7-methoxy-2,2-dimethylchroman-6-yl)-3-(4-hydroxyphenyl)propan-1-one            | C <sub>21</sub> H <sub>24</sub> O <sub>5</sub>      |
| 26 | 1-(5-hydroxy-7-methoxy-2,2-dimethylchroman-8-yl)-3-(4-hydroxyphenyl)propan-1-one            | C <sub>21</sub> H <sub>24</sub> O <sub>5</sub>      |
| 27 | (E)-3-(4-chlorophenyl)-1-(2-(3,4,5-trimethoxyphenoxy)phenyl)prop-2-en-1-one                 | C <sub>24</sub> H <sub>21</sub> ClO <sub>5</sub>    |
| 28 | (E)-3-(4-methoxyphenyl)-1-(2-(3,4,5-trimethoxyphenoxy)phenyl)prop-2-en-1-one                | C <sub>25</sub> H <sub>24</sub> O <sub>6</sub>      |
| 29 | (E)-3-(4-(diethylamino)phenyl)-1-(2-(3,4,5-trimethoxyphenoxy)phenyl)prop-2-en-1-one         | C <sub>28</sub> H <sub>31</sub> NO <sub>5</sub>     |
| 30 | (E)-3-(4-(dimethylamino)phenyl)-1-(2-(3,4,5-trimethoxyphenoxy)phenyl)prop-2-en-1-one        | C <sub>26</sub> H <sub>27</sub> NO <sub>5</sub>     |
| 31 | (E)-1-(2-(3,4,5-trimethoxyphenoxy)phenyl)-3-(3,4,5-trimethoxyphenyl)prop-2-en-1-one         | C <sub>27</sub> H <sub>28</sub> O <sub>8</sub>      |
| 32 | (E)-3-phenyl-1-(2-(3,4,5-trimethoxyphenoxy)phenyl)prop-2-en-1-one                           | C <sub>24</sub> H <sub>22</sub> O <sub>5</sub>      |
| 33 | (E)-3-(2-fluorophenyl)-1-(2-(3,4,5-trimethoxyphenoxy)phenyl)prop-2-en-1-one                 | C <sub>24</sub> H <sub>21</sub> FO <sub>5</sub>     |
| 34 | (E)-3-(naphthalen-1-yl)-1-(2-(3,4,5-trimethoxyphenoxy)phenyl)prop-2-en-1-one                | C <sub>28</sub> H <sub>24</sub> O <sub>5</sub>      |
| 35 | (E)-3-(4-bromophenyl)-1-(2-(3,4,5-trimethoxyphenoxy)phenyl)prop-2-en-1-one                  | C <sub>24</sub> H <sub>21</sub> BrO <sub>5</sub>    |
| 36 | (E)-3-(4-fluorophenyl)-1-(2-(3,4,5-trimethoxyphenoxy)phenyl)prop-2-en-1-one                 | C <sub>24</sub> H <sub>21</sub> FO <sub>5</sub>     |
| 37 | (E)-3-(3-fluorophenyl)-1-(2-(3,4,5-trimethoxyphenoxy)phenyl)prop-2-en-1-one                 | C <sub>24</sub> H <sub>21</sub> FO <sub>5</sub>     |
| 38 | (E)-1-(2-(3,4,5-trimethoxyphenoxy)phenyl)-3-(2,3,4-trimethoxyphenyl)prop-2-en-1-one         | C <sub>27</sub> H <sub>28</sub> O <sub>8</sub>      |
| 39 | (E)-3-(4-methoxy-3-nitrophenyl)-1-(2-(3,4,5-trimethoxyphenoxy)phenyl)prop-2-en-1-one        | C <sub>25</sub> H <sub>23</sub> NO <sub>8</sub>     |
| 40 | (E)-3-(naphthalen-2-yl)-1-(2-(3,4,5-trimethoxyphenoxy)phenyl)prop-2-en-1-one                | C <sub>28</sub> H <sub>24</sub> O <sub>5</sub>      |
| 41 | (E)-3-(3-chlorophenyl)-1-(2-(3,4,5-trimethoxyphenoxy)phenyl)prop-2-en-1-one                 | C <sub>24</sub> H <sub>21</sub> ClO <sub>5</sub>    |
| 42 | (E)-3-(3-amino-4-methoxyphenyl)-1-(2-(3,4,5-trimethoxyphenoxy)phenyl)prop-2-en-1-one        | C <sub>25</sub> H <sub>25</sub> NO <sub>6</sub>     |
| 43 | 5-cinnamoyl-2-methoxybenzenesulfonamide                                                     | C <sub>16</sub> H <sub>15</sub> NO <sub>4</sub> S   |
| 44 | (E)-5-(3-(4-chlorophenyl)acryloyl)-2-methoxybenzenesulfonamide                              | C <sub>16</sub> H <sub>14</sub> ClNO <sub>4</sub> S |
| 45 | (E)-2-methoxy-5-(3-(p-tolyl)acryloyl)benzenesulfonamide                                     | C <sub>17</sub> H <sub>17</sub> NO <sub>4</sub> S   |
| 46 | (E)-2-methoxy-5-(3-(4-methoxyphenyl)acryloyl)benzenesulfonamide                             | C <sub>17</sub> H <sub>17</sub> NO <sub>5</sub> S   |

|    |                                                                                                                            |                                                                   |
|----|----------------------------------------------------------------------------------------------------------------------------|-------------------------------------------------------------------|
| 47 | (E)-2-methoxy-5-(3-(3,4,5-trimethoxyphenyl)acryloyl)benzenesulfonamide                                                     | C <sub>19</sub> H <sub>21</sub> NO <sub>7</sub> S                 |
| 48 | (E)-5-(3-(benzo[d][1,3]dioxol-5-yl)acryloyl)-2-methoxybenzenesulfonamide                                                   | C <sub>17</sub> H <sub>15</sub> NO <sub>6</sub> S                 |
| 49 | N-(4-amino-2-methyl-6-oxo-1,4,5,6-tetrahydropyrimidin-5-yl)-5-cinnamoyl-2-methoxybenzenesulfonamide                        | C <sub>21</sub> H <sub>22</sub> N <sub>4</sub> O <sub>5</sub> S   |
| 50 | (E)-N-(4-amino-2-methyl-6-oxo-1,4,5,6-tetrahydropyrimidin-5-yl)-5-(3-(4-chlorophenyl)acryloyl)-2-methoxybenzenesulfonamide | C <sub>21</sub> H <sub>21</sub> ClN <sub>4</sub> O <sub>5</sub> S |
| 51 | (E)-N-(4-amino-2-methyl-6-oxo-1,4,5,6-tetrahydropyrimidin-5-yl)-2-methoxy-5-(3-(p-tolyl)acryloyl)benzenesulfonamide        | C <sub>22</sub> H <sub>24</sub> N <sub>4</sub> O <sub>5</sub> S   |
| 52 | (E)-N-(4-amino-2-methyl-6-oxo-1,4,5,6-tetrahydropyrimidin-5-yl)-2-methoxy-5-(3-(p-tolyl)acryloyl)benzenesulfonamide        | C <sub>22</sub> H <sub>24</sub> N <sub>4</sub> O <sub>6</sub> S   |
| 53 | (E)-N-(4-amino-2-methyl-6-oxo-1,4,5,6-tetrahydropyrimidin-5-yl)-2-methoxy-5-(3-(p-tolyl)acryloyl)benzenesulfonamide        | C <sub>24</sub> H <sub>28</sub> N <sub>4</sub> O <sub>8</sub> S   |
| 54 | (E)-N-(4-amino-2-methyl-6-oxo-1,4,5,6-tetrahydropyrimidin-5-yl)-2-methoxy-5-(3-(p-tolyl)acryloyl)benzenesulfonamide        | C <sub>22</sub> H <sub>22</sub> N <sub>4</sub> O <sub>7</sub> S   |
| 55 | (2E,2'E)-1,1'-(2-hydroxy-4,6-dimethoxy-1,3-phenylene)bis(3-phenylprop-2-en-1-one)                                          | C <sub>26</sub> H <sub>22</sub> O <sub>5</sub>                    |
| 56 | (2E,2'E)-1,1'-(2-hydroxy-4,6-dimethoxy-1,3-phenylene)bis(3-(2-fluorophenyl)prop-2-en-1-one)                                | C <sub>26</sub> H <sub>20</sub> F <sub>2</sub> O <sub>5</sub>     |
| 57 | (2E,2'E)-1,1'-(2-hydroxy-4,6-dimethoxy-1,3-phenylene)bis(3-(3-fluorophenyl)prop-2-en-1-one)                                | C <sub>26</sub> H <sub>20</sub> F <sub>2</sub> O <sub>5</sub>     |
| 58 | (2E,2'E)-1,1'-(2-hydroxy-4,6-dimethoxy-1,3-phenylene)bis(3-(4-fluorophenyl)prop-2-en-1-one)                                | C <sub>26</sub> H <sub>20</sub> F <sub>2</sub> O <sub>5</sub>     |
| 59 | (2E,2'E)-1,1'-(2-hydroxy-4,6-dimethoxy-1,3-phenylene)bis(3-(2,3-difluorophenyl)prop-2-en-1-one)                            | C <sub>26</sub> H <sub>18</sub> F <sub>4</sub> O <sub>5</sub>     |
| 60 | (2E,2'E)-1,1'-(2-hydroxy-4,6-dimethoxy-1,3-phenylene)bis(3-(2,4-difluorophenyl)prop-2-en-1-one)                            | C <sub>26</sub> H <sub>18</sub> F <sub>4</sub> O <sub>5</sub>     |
| 61 | (2E,2'E)-1,1'-(2-hydroxy-4,6-dimethoxy-1,3-phenylene)bis(3-(2,5-difluorophenyl)prop-2-en-1-one)                            | C <sub>26</sub> H <sub>18</sub> F <sub>4</sub> O <sub>5</sub>     |
| 62 | (2E,2'E)-1,1'-(2-hydroxy-4,6-dimethoxy-1,3-phenylene)bis(3-(3,4-difluorophenyl)prop-2-en-1-one)                            | C <sub>26</sub> H <sub>18</sub> F <sub>4</sub> O <sub>5</sub>     |
| 63 | (E)-1-(2-aminophenyl)-3-phenylprop-2-en-1-one                                                                              | C <sub>15</sub> H <sub>13</sub> NO                                |
| 64 | (E)-1-(2-aminophenyl)-3-(4-ethylphenyl)prop-2-en-1-one                                                                     | C <sub>17</sub> H <sub>17</sub> NO                                |
| 65 | (E)-4-(3-(2-aminophenyl)-3-oxoprop-1-en-1-yl)benzoic acid                                                                  | C <sub>16</sub> H <sub>13</sub> NO <sub>3</sub>                   |
| 66 | (E)-1-(2-aminophenyl)-3-(2-nitrophenyl)prop-2-en-1-one                                                                     | C <sub>15</sub> H <sub>12</sub> N <sub>2</sub> O <sub>3</sub>     |
| 67 | (E)-1-(2-aminophenyl)-3-(2-(benzyloxy)phenyl)prop-2-en-1-one                                                               | C <sub>22</sub> H <sub>19</sub> NO <sub>2</sub>                   |
| 68 | (E)-1-(2-aminophenyl)-3-(4-(benzyloxy)-3-methoxyphenyl)prop-2-en-1-one                                                     | C <sub>23</sub> H <sub>21</sub> NO <sub>3</sub>                   |
| 69 | (E)-1-(3-aminophenyl)-3-phenylprop-2-en-1-one                                                                              | C <sub>15</sub> H <sub>13</sub> NO                                |
| 70 | (E)-1-(3-aminophenyl)-3-(4-ethylphenyl)prop-2-en-1-one                                                                     | C <sub>17</sub> H <sub>17</sub> NO                                |
| 71 | (E)-4-(3-(3-aminophenyl)-3-oxoprop-1-en-1-yl)benzoic acid                                                                  | C <sub>16</sub> H <sub>13</sub> NO <sub>3</sub>                   |
| 72 | (E)-1-(3-aminophenyl)-3-(4-nitrophenyl)prop-2-en-1-one                                                                     | C <sub>15</sub> H <sub>12</sub> N <sub>2</sub> O <sub>3</sub>     |
| 73 | (E)-1-(3-aminophenyl)-3-(4-(benzyloxy)phenyl)prop-2-en-1-one                                                               | C <sub>22</sub> H <sub>19</sub> NO <sub>2</sub>                   |

|    |                                                                                                         |                                                               |
|----|---------------------------------------------------------------------------------------------------------|---------------------------------------------------------------|
| 74 | (E)-1-(3-aminophenyl)-3-(4-(benzyloxy)-3-methoxyphenyl)prop-2-en-1-one                                  | C <sub>23</sub> H <sub>21</sub> NO <sub>3</sub>               |
| 75 | (E)-1-(4-aminophenyl)-3-phenylprop-2-en-1-one                                                           | C <sub>15</sub> H <sub>13</sub> NO                            |
| 76 | (E)-1-(4-aminophenyl)-3-(4-ethylphenyl)prop-2-en-1-one                                                  | C <sub>17</sub> H <sub>17</sub> NO                            |
| 77 | (E)-4-(3-(4-aminophenyl)-3-oxoprop-1-en-1-yl)benzoic acid                                               | C <sub>16</sub> H <sub>13</sub> NO <sub>3</sub>               |
| 78 | (E)-1-(4-aminophenyl)-3-(4-nitrophenyl)prop-2-en-1-one                                                  | C <sub>15</sub> H <sub>12</sub> N <sub>2</sub> O <sub>3</sub> |
| 79 | (E)-1-(4-aminophenyl)-3-(4-(benzyloxy)phenyl)prop-2-en-1-one                                            | C <sub>22</sub> H <sub>19</sub> NO <sub>2</sub>               |
| 80 | (E)-1-(4-aminophenyl)-3-(4-(benzyloxy)-3-methoxyphenyl)prop-2-en-1-one                                  | C <sub>23</sub> H <sub>21</sub> NO <sub>3</sub>               |
| 81 | (E)-1-(3-amino-4-methoxyphenyl)-3-phenylprop-2-en-1-one                                                 | C <sub>16</sub> H <sub>15</sub> NO <sub>2</sub>               |
| 82 | (E)-1-(3-amino-4-methoxyphenyl)-3-(4-methoxyphenyl)prop-2-en-1-one                                      | C <sub>17</sub> H <sub>17</sub> NO <sub>3</sub>               |
| 83 | (E)-1-(3-amino-4-methoxyphenyl)-3-(3-methoxyphenyl)prop-2-en-1-one                                      | C <sub>17</sub> H <sub>17</sub> NO <sub>3</sub>               |
| 84 | (E)-1-(3-amino-4-methoxyphenyl)-3-(3,5-dimethoxyphenyl)prop-2-en-1-one                                  | C <sub>18</sub> H <sub>19</sub> NO <sub>4</sub>               |
| 85 | (E)-1-(3-amino-4-methoxyphenyl)-3-(3,5-dimethoxyphenyl)prop-2-en-1-one                                  | C <sub>18</sub> H <sub>19</sub> NO <sub>4</sub>               |
| 86 | (E)-1-(3-amino-4-methoxyphenyl)-3-(3,4,5-trimethoxyphenyl)prop-2-en-1-one                               | C <sub>19</sub> H <sub>21</sub> NO <sub>5</sub>               |
| 87 | (E)-3-(3-amino-4-methoxyphenyl)-1-(3,4,5-trimethoxyphenyl)prop-2-en-1-one                               | C <sub>19</sub> H <sub>21</sub> NO <sub>5</sub>               |
| 88 | (E)-3-(4-aminophenyl)-1-(3,4,5-trimethoxyphenyl)prop-2-en-1-one                                         | C <sub>18</sub> H <sub>19</sub> NO <sub>4</sub>               |
| 89 | (E)-3-(4-aminophenyl)-1-(2,5-dimethoxyphenyl)prop-2-en-1-one                                            | C <sub>17</sub> H <sub>17</sub> NO <sub>3</sub>               |
| 90 | (E)-3-(3-amino-4-methoxyphenyl)-1-(2,5-dimethoxyphenyl)prop-2-en-1-one                                  | C <sub>18</sub> H <sub>19</sub> NO <sub>4</sub>               |
| 91 | (E)-1-(3-amino-4-methoxyphenyl)-3-(2,5-dimethoxyphenyl)prop-2-en-1-one                                  | C <sub>18</sub> H <sub>19</sub> NO <sub>4</sub>               |
| 92 | (E)-3-(3-amino-4-methoxyphenyl)-1-(4-methoxynaphthalen-1-yl)prop-2-en-1-one                             | C <sub>21</sub> H <sub>19</sub> NO <sub>3</sub>               |
| 93 | (E)-3-(4-methoxy-3-(propylamino)phenyl)-1-(4-methoxynaphthalen-1-yl)prop-2-en-1-one                     | C <sub>24</sub> H <sub>25</sub> NO <sub>3</sub>               |
| 94 | (E)-3-(3-(butylamino)-4-methoxyphenyl)-1-(4-methoxynaphthalen-1-yl)prop-2-en-1-one                      | C <sub>25</sub> H <sub>27</sub> NO <sub>3</sub>               |
| 95 | (E)-N-(2-methoxy-5-(3-(4-methoxynaphthalen-1-yl)-3-oxoprop-1-en-1-yl)phenyl)propionamide                | C <sub>24</sub> H <sub>23</sub> NO <sub>4</sub>               |
| 96 | (E)-4-(((2-methoxy-5-(3-(4-methoxynaphthalen-1-yl)-3-oxoprop-1-en-1-yl)phenyl)amino)methyl)benzonitrile | C <sub>29</sub> H <sub>24</sub> N <sub>2</sub> O <sub>3</sub> |
| 97 | (E)-N-(2-methoxy-5-(3-(4-methoxynaphthalen-1-yl)-3-oxoprop-1-en-1-yl)phenyl)acetamide                   | C <sub>23</sub> H <sub>21</sub> NO <sub>4</sub>               |
| 98 | (E)-3-(4-methoxy-3-(methylamino)phenyl)-1-(4-methoxynaphthalen-1-yl)prop-2-en-1-one                     | C <sub>22</sub> H <sub>21</sub> NO <sub>3</sub>               |
| 99 | (E)-3-(3-(((4-(tert-butyl)benzyl)amino)-4-methoxyphenyl)-1-(4-methoxynaphthalen-1-yl)prop-2-en-1-one    | C <sub>32</sub> H <sub>33</sub> NO <sub>3</sub>               |

|     |                                                                                                   |                                                                 |
|-----|---------------------------------------------------------------------------------------------------|-----------------------------------------------------------------|
| 100 | (E)-N-(2-methoxy-5-(3-(4-methoxynaphthalen-1-yl)-3-oxoprop-1-en-1-yl)phenyl)isobutyramide         | C <sub>25</sub> H <sub>25</sub> NO <sub>4</sub>                 |
| 101 | (E)-N-(2-methoxy-5-(3-(4-methoxynaphthalen-1-yl)-3-oxoprop-1-en-1-yl)phenyl)heptanamide           | C <sub>28</sub> H <sub>31</sub> NO <sub>4</sub>                 |
| 102 | (E)-N-(2-methoxy-5-(3-(4-methoxynaphthalen-1-yl)-3-oxoprop-1-en-1-yl)phenyl)pivalamide            | C <sub>26</sub> H <sub>27</sub> NO <sub>4</sub>                 |
| 103 | (E)-4-chloro-N-(2-hydroxy-5-(3-(4-methoxynaphthalen-1-yl)-3-oxoprop-1-en-1-yl)phenyl)butanamide   | C <sub>24</sub> H <sub>22</sub> ClNO <sub>4</sub>               |
| 104 | (E)-3-(1-benzyl-2-(methylthio)-1H-imidazol-4-yl)-1-(4-bromophenyl)prop-2-en-1-one                 | C <sub>20</sub> H <sub>17</sub> BrN <sub>2</sub> OS             |
| 105 | (E)-3-(1-benzyl-2-(methylthio)-1H-imidazol-4-yl)-1-(4-fluorophenyl)prop-2-en-1-one                | C <sub>20</sub> H <sub>17</sub> FN <sub>2</sub> OS              |
| 106 | (E)-3-(1-benzyl-2-(methylthio)-1H-imidazol-4-yl)-1-(4-chlorophenyl)prop-2-en-1-one                | C <sub>20</sub> H <sub>17</sub> ClN <sub>2</sub> OS             |
| 107 | (E)-3-(1-benzyl-2-(methylthio)-1H-imidazol-4-yl)-1-(4-nitrophenyl)prop-2-en-1-one                 | C <sub>20</sub> H <sub>17</sub> N <sub>3</sub> O <sub>3</sub> S |
| 108 | (E)-3-(1-benzyl-2-(methylthio)-1H-imidazol-4-yl)-1-(4-phenoxyphenyl)prop-2-en-1-one               | C <sub>26</sub> H <sub>22</sub> N <sub>2</sub> O <sub>2</sub> S |
| 109 | (E)-3-(1-benzyl-2-(methylthio)-1H-imidazol-4-yl)-1-(p-tolyl)prop-2-en-1-one                       | C <sub>21</sub> H <sub>20</sub> N <sub>2</sub> OS               |
| 110 | (E)-1-([1,1':2',1''-terphenyl]-4'-yl)-3-(1-benzyl-2-(methylthio)-1H-imidazol-4-yl)prop-2-en-1-one | C <sub>32</sub> H <sub>26</sub> N <sub>2</sub> OS               |
| 111 | (E)-3-(1-benzyl-2-(methylthio)-1H-imidazol-4-yl)-1-(4-methoxyphenyl)prop-2-en-1-one               | C <sub>21</sub> H <sub>20</sub> N <sub>2</sub> O <sub>2</sub> S |
| 112 | (E)-3-(1-benzyl-2-(methylthio)-1H-imidazol-4-yl)-1-(3,4,5-trimethoxyphenyl)prop-2-en-1-one        | C <sub>23</sub> H <sub>24</sub> N <sub>2</sub> O <sub>4</sub> S |
| 113 | (E)-3-(1-benzyl-2-(ethylthio)-1H-imidazol-4-yl)-1-(4-bromophenyl)prop-2-en-1-one                  | C <sub>21</sub> H <sub>19</sub> BrN <sub>2</sub> OS             |
| 114 | (E)-3-(1-benzyl-2-(ethylthio)-1H-imidazol-4-yl)-1-(4-fluorophenyl)prop-2-en-1-one                 | C <sub>21</sub> H <sub>19</sub> FN <sub>2</sub> OS              |
| 115 | (E)-3-(1-benzyl-2-(ethylthio)-1H-imidazol-4-yl)-1-(4-chlorophenyl)prop-2-en-1-one                 | C <sub>21</sub> H <sub>19</sub> ClN <sub>2</sub> OS             |
| 116 | (E)-3-(1-benzyl-2-(ethylthio)-1H-imidazol-4-yl)-1-(4-nitrophenyl)prop-2-en-1-one                  | C <sub>21</sub> H <sub>19</sub> N <sub>3</sub> O <sub>3</sub> S |
| 117 | (E)-3-(1-benzyl-2-(ethylthio)-1H-imidazol-4-yl)-1-(4-phenoxyphenyl)prop-2-en-1-one                | C <sub>27</sub> H <sub>24</sub> N <sub>2</sub> O <sub>2</sub> S |
| 118 | (E)-3-(1-benzyl-2-(ethylthio)-1H-imidazol-4-yl)-1-(p-tolyl)prop-2-en-1-one                        | C <sub>22</sub> H <sub>22</sub> N <sub>2</sub> OS               |
| 119 | (E)-1-([1,1':2',1''-terphenyl]-4'-yl)-3-(1-benzyl-2-(ethylthio)-1H-imidazol-4-yl)prop-2-en-1-one  | C <sub>33</sub> H <sub>28</sub> N <sub>2</sub> OS               |
| 120 | (E)-3-(1-benzyl-2-(ethylthio)-1H-imidazol-4-yl)-1-(4-methoxyphenyl)prop-2-en-1-one                | C <sub>22</sub> H <sub>22</sub> N <sub>2</sub> O <sub>2</sub> S |
| 121 | (E)-3-(1-benzyl-2-(ethylthio)-1H-imidazol-4-yl)-1-(3,4,5-trimethoxyphenyl)prop-2-en-1-one         | C <sub>24</sub> H <sub>26</sub> N <sub>2</sub> O <sub>4</sub> S |

|     |                                                                                                                     |                                                                 |
|-----|---------------------------------------------------------------------------------------------------------------------|-----------------------------------------------------------------|
| 122 | (E)-1-phenyl-3-(1-phenyl-3-(3,4,5-trimethoxyphenyl)-1H-pyrazol-4-yl)prop-2-en-1-one                                 | C <sub>27</sub> H <sub>24</sub> N <sub>2</sub> O <sub>4</sub>   |
| 123 | (E)-1-(4-chlorophenyl)-3-(1-phenyl-3-(3,4,5-trimethoxyphenyl)-1H-pyrazol-4-yl)prop-2-en-1-one                       | C <sub>27</sub> H <sub>23</sub> ClN <sub>2</sub> O <sub>4</sub> |
| 124 | (E)-3-(1-phenyl-3-(3,4,5-trimethoxyphenyl)-1H-pyrazol-4-yl)-1-(3,4,5-trimethoxyphenyl)prop-2-en-1-one               | C <sub>30</sub> H <sub>30</sub> N <sub>2</sub> O <sub>7</sub>   |
| 125 | (E)-1-(2-methylpyridin-3-yl)-3-(1-phenyl-3-(3,4,5-trimethoxyphenyl)-1H-pyrazol-4-yl)prop-2-en-1-one                 | C <sub>27</sub> H <sub>25</sub> N <sub>3</sub> O <sub>4</sub>   |
| 126 | (E)-1-(4-methylpyridin-2-yl)-3-(1-phenyl-3-(3,4,5-trimethoxyphenyl)-1H-pyrazol-4-yl)prop-2-en-1-one                 | C <sub>27</sub> H <sub>25</sub> N <sub>3</sub> O <sub>4</sub>   |
| 127 | (E)-1-(6-methylpyridin-2-yl)-3-(1-phenyl-3-(3,4,5-trimethoxyphenyl)-1H-pyrazol-4-yl)prop-2-en-1-one                 | C <sub>27</sub> H <sub>25</sub> N <sub>3</sub> O <sub>4</sub>   |
| 128 | (E)-1-(5-chloropyridin-2-yl)-3-(1-phenyl-3-(3,4,5-trimethoxyphenyl)-1H-pyrazol-4-yl)prop-2-en-1-one                 | C <sub>26</sub> H <sub>22</sub> ClN <sub>3</sub> O <sub>4</sub> |
| 129 | (E)-3-(1-phenyl-3-(3,4,5-trimethoxyphenyl)-1H-pyrazol-4-yl)-1-(thiazol-2-yl)prop-2-en-1-one                         | C <sub>24</sub> H <sub>21</sub> N <sub>3</sub> O <sub>4</sub> S |
| 130 | (E)-1-(1-methyl-1H-benzo[d]imidazol-2-yl)-3-(1-phenyl-3-(3,4,5-trimethoxyphenyl)-1H-pyrazol-4-yl)prop-2-en-1-one    | C <sub>29</sub> H <sub>26</sub> N <sub>4</sub> O <sub>4</sub>   |
| 131 | (E)-1-phenyl-3-(1-phenyl-3-(thiophen-3-yl)-4,5-dihydro-1H-pyrazol-4-yl)prop-2-en-1-one                              | C <sub>22</sub> H <sub>18</sub> N <sub>2</sub> OS               |
| 132 | (E)-3-(1-phenyl-3-(thiophen-3-yl)-4,5-dihydro-1H-pyrazol-4-yl)-1-(3,4,5-trimethoxyphenyl)prop-2-en-1-one            | C <sub>25</sub> H <sub>24</sub> N <sub>2</sub> O <sub>4</sub> S |
| 133 | (E)-3-(1-phenyl-3-(thiophen-3-yl)-4,5-dihydro-1H-pyrazol-4-yl)-1-(2,4,6-trimethoxyphenyl)prop-2-en-1-one            | C <sub>25</sub> H <sub>24</sub> N <sub>2</sub> O <sub>4</sub> S |
| 134 | (E)-3-(1-phenyl-3-(thiophen-3-yl)-4,5-dihydro-1H-pyrazol-4-yl)-1-(2,3,4-trimethoxyphenyl)prop-2-en-1-one            | C <sub>25</sub> H <sub>24</sub> N <sub>2</sub> O <sub>4</sub> S |
| 135 | (E)-1-(3,4-dimethoxyphenyl)-3-(1-phenyl-3-(thiophen-3-yl)-4,5-dihydro-1H-pyrazol-4-yl)prop-2-en-1-one               | C <sub>24</sub> H <sub>22</sub> N <sub>2</sub> O <sub>3</sub> S |
| 136 | (E)-1-(2,5-dimethoxyphenyl)-3-(1-phenyl-3-(thiophen-3-yl)-4,5-dihydro-1H-pyrazol-4-yl)prop-2-en-1-one               | C <sub>24</sub> H <sub>22</sub> N <sub>2</sub> O <sub>3</sub> S |
| 137 | (E)-1-(2,4-dimethoxyphenyl)-3-(1-phenyl-3-(thiophen-3-yl)-4,5-dihydro-1H-pyrazol-4-yl)prop-2-en-1-one               | C <sub>24</sub> H <sub>22</sub> N <sub>2</sub> O <sub>3</sub> S |
| 138 | (E)-1-(benzo[d][1,3]dioxol-5-yl)-3-(1-phenyl-3-(thiophen-3-yl)-4,5-dihydro-1H-pyrazol-4-yl)prop-2-en-1-one          | C <sub>23</sub> H <sub>18</sub> N <sub>2</sub> O <sub>3</sub> S |
| 139 | (E)-3-(3-(benzo[d][1,3]dioxol-5-yl)-1-phenyl-4,5-dihydro-1H-pyrazol-4-yl)-1-phenylprop-2-en-1-one                   | C <sub>25</sub> H <sub>20</sub> N <sub>2</sub> O <sub>3</sub>   |
| 140 | (E)-3-(3-(benzo[d][1,3]dioxol-5-yl)-1-phenyl-4,5-dihydro-1H-pyrazol-4-yl)-1-(3,4,5-trimethoxyphenyl)prop-2-en-1-one | C <sub>28</sub> H <sub>26</sub> N <sub>2</sub> O <sub>6</sub>   |
| 141 | (E)-3-(3-(benzo[d][1,3]dioxol-5-yl)-1-phenyl-4,5-dihydro-1H-pyrazol-4-yl)-1-(2,4,6-trimethoxyphenyl)prop-2-en-1-one | C <sub>28</sub> H <sub>26</sub> N <sub>2</sub> O <sub>6</sub>   |
| 142 | (E)-3-(3-(benzo[d][1,3]dioxol-5-yl)-1-phenyl-4,5-dihydro-1H-pyrazol-4-yl)-1-(2,3,4-trimethoxyphenyl)prop-2-en-1-one | C <sub>28</sub> H <sub>26</sub> N <sub>2</sub> O <sub>6</sub>   |
| 143 | (E)-3-(3-(benzo[d][1,3]dioxol-5-yl)-1-phenyl-4,5-dihydro-1H-pyrazol-4-yl)-1-(3,4-dimethoxyphenyl)prop-2-en-1-one    | C <sub>27</sub> H <sub>24</sub> N <sub>2</sub> O <sub>5</sub>   |
| 144 | (E)-3-(3-(benzo[d][1,3]dioxol-5-yl)-1-phenyl-4,5-dihydro-1H-pyrazol-4-yl)-1-(2,5-dimethoxyphenyl)prop-2-en-1-one    | C <sub>27</sub> H <sub>24</sub> N <sub>2</sub> O <sub>5</sub>   |



|     |                                                                                                                       |                                                                 |
|-----|-----------------------------------------------------------------------------------------------------------------------|-----------------------------------------------------------------|
| 145 | (E)-3-(3-(benzo[d][1,3]dioxol-5-yl)-1-phenyl-4,5-dihydro-1H-pyrazol-4-yl)-1-(2,4-dimethoxyphenyl)prop-2-en-1-one      | C <sub>27</sub> H <sub>24</sub> N <sub>2</sub> O <sub>5</sub>   |
| 146 | (E)-3-(3-(benzo[d][1,3]dioxol-5-yl)-1-phenyl-4,5-dihydro-1H-pyrazol-4-yl)-1-(thiophen-3-yl)prop-2-en-1-one            | C <sub>23</sub> H <sub>18</sub> N <sub>2</sub> O <sub>3</sub> S |
| 147 | (E)-3-(3-(benzo[d][1,3]dioxol-5-yl)-1-phenyl-4,5-dihydro-1H-pyrazol-4-yl)-1-(pyridin-2-yl)prop-2-en-1-one             | C <sub>24</sub> H <sub>19</sub> N <sub>3</sub> O <sub>3</sub>   |
| 148 | (E)-3-(3-(benzo[d][1,3]dioxol-5-yl)-1-phenyl-4,5-dihydro-1H-pyrazol-4-yl)-1-(pyridin-3-yl)prop-2-en-1-one             | C <sub>24</sub> H <sub>19</sub> N <sub>3</sub> O <sub>3</sub>   |
| 149 | (E)-1-(benzo[d][1,3]dioxol-5-yl)-3-(3-(benzo[d][1,3]dioxol-5-yl)-1-phenyl-4,5-dihydro-1H-pyrazol-4-yl)prop-2-en-1-one | C <sub>26</sub> H <sub>20</sub> N <sub>2</sub> O <sub>5</sub>   |
| 150 | (E)-3-(3-(benzo[d][1,3]dioxol-5-yl)-1-phenyl-4,5-dihydro-1H-pyrazol-4-yl)-1-(1H-pyrrol-3-yl)prop-2-en-1-one           | C <sub>23</sub> H <sub>19</sub> N <sub>3</sub> O <sub>3</sub>   |
| 151 | (E)-3-(1-phenyl-3-(pyridin-3-yl)-4,5-dihydro-1H-pyrazol-4-yl)-1-(thiophen-3-yl)prop-2-en-1-one                        | C <sub>21</sub> H <sub>17</sub> N <sub>3</sub> OS               |
| 152 | (E)-3-(1-phenyl-3-(pyridin-3-yl)-4,5-dihydro-1H-pyrazol-4-yl)-1-(pyridin-2-yl)prop-2-en-1-one                         | C <sub>22</sub> H <sub>18</sub> N <sub>4</sub> O                |
| 153 | (E)-1-(benzo[d][1,3]dioxol-5-yl)-3-(1-phenyl-3-(pyridin-3-yl)-4,5-dihydro-1H-pyrazol-4-yl)prop-2-en-1-one             | C <sub>24</sub> H <sub>19</sub> N <sub>3</sub> O <sub>3</sub>   |
| 154 | (E)-3-(1-phenyl-3-(pyridin-3-yl)-4,5-dihydro-1H-pyrazol-4-yl)-1-(2H-pyrrol-4-yl)prop-2-en-1-one                       | C <sub>21</sub> H <sub>18</sub> N <sub>4</sub> O                |
| 155 | (E)-1-(1H-indol-3-yl)-3-(1-phenyl-3-(pyridin-3-yl)-4,5-dihydro-1H-pyrazol-4-yl)prop-2-en-1-one                        | C <sub>25</sub> H <sub>20</sub> N <sub>4</sub> O                |
| 156 | (E)-1-phenyl-3-(1-phenyl-3-(pyridin-3-yl)-4,5-dihydro-1H-pyrazol-4-yl)prop-2-en-1-one                                 | C <sub>23</sub> H <sub>19</sub> N <sub>3</sub> O                |
| 157 | (E)-3-(1-phenyl-3-(pyridin-3-yl)-4,5-dihydro-1H-pyrazol-4-yl)-1-(3,4,5-trimethoxyphenyl)prop-2-en-1-one               | C <sub>26</sub> H <sub>25</sub> N <sub>3</sub> O <sub>4</sub>   |
| 158 | (E)-3-(1-phenyl-3-(pyridin-3-yl)-4,5-dihydro-1H-pyrazol-4-yl)-1-(2,4,6-trimethoxyphenyl)prop-2-en-1-one               | C <sub>26</sub> H <sub>25</sub> N <sub>3</sub> O <sub>4</sub>   |
| 159 | (E)-3-(1-phenyl-3-(pyridin-3-yl)-4,5-dihydro-1H-pyrazol-4-yl)-1-(2,3,4-trimethoxyphenyl)prop-2-en-1-one               | C <sub>26</sub> H <sub>25</sub> N <sub>3</sub> O <sub>4</sub>   |
| 160 | (E)-1-(3,4-dimethoxyphenyl)-3-(1-phenyl-3-(pyridin-3-yl)-4,5-dihydro-1H-pyrazol-4-yl)prop-2-en-1-one                  | C <sub>25</sub> H <sub>23</sub> N <sub>3</sub> O <sub>3</sub>   |
| 161 | (E)-1-(2,5-dimethoxyphenyl)-3-(1-phenyl-3-(pyridin-3-yl)-4,5-dihydro-1H-pyrazol-4-yl)prop-2-en-1-one                  | C <sub>25</sub> H <sub>23</sub> N <sub>3</sub> O <sub>3</sub>   |
| 162 | (E)-1-(2,4-dimethoxyphenyl)-3-(1-phenyl-3-(pyridin-3-yl)-4,5-dihydro-1H-pyrazol-4-yl)prop-2-en-1-one                  | C <sub>25</sub> H <sub>23</sub> N <sub>3</sub> O <sub>3</sub>   |
| 163 | (E)-3-(1-phenyl-3-(pyridin-4-yl)-4,5-dihydro-1H-pyrazol-4-yl)-1-(thiophen-3-yl)prop-2-en-1-one                        | C <sub>21</sub> H <sub>17</sub> N <sub>3</sub> OS               |
| 164 | (E)-1-(benzo[d][1,3]dioxol-5-yl)-3-(1-phenyl-3-(pyridin-4-yl)-4,5-dihydro-1H-pyrazol-4-yl)prop-2-en-1-one             | C <sub>24</sub> H <sub>19</sub> N <sub>3</sub> O <sub>3</sub>   |
| 165 | (E)-3-(1-phenyl-3-(pyridin-4-yl)-4,5-dihydro-1H-pyrazol-4-yl)-1-(1H-pyrrol-3-yl)prop-2-en-1-one                       | C <sub>21</sub> H <sub>18</sub> N <sub>4</sub> O                |
| 166 | (E)-1-phenyl-3-(1-phenyl-3-(pyridin-4-yl)-4,5-dihydro-1H-pyrazol-4-yl)prop-2-en-1-one                                 | C <sub>23</sub> H <sub>19</sub> N <sub>3</sub> O                |
| 167 | (E)-3-(1-phenyl-3-(pyridin-4-yl)-4,5-dihydro-1H-pyrazol-4-yl)-1-(3,4,5-trimethoxyphenyl)prop-2-en-1-one               | C <sub>26</sub> H <sub>25</sub> N <sub>3</sub> O <sub>4</sub>   |

|     |                                                                                                                                              |                                                                   |
|-----|----------------------------------------------------------------------------------------------------------------------------------------------|-------------------------------------------------------------------|
| 168 | (E)-3-(1-phenyl-3-(pyridin-4-yl)-4,5-dihydro-1H-pyrazol-4-yl)-1-(2,4,6-trimethoxyphenyl)prop-2-en-1-one                                      | C <sub>26</sub> H <sub>25</sub> N <sub>3</sub> O <sub>4</sub>     |
| 169 | (E)-3-(1-phenyl-3-(pyridin-4-yl)-4,5-dihydro-1H-pyrazol-4-yl)-1-(2,3,4-trimethoxyphenyl)prop-2-en-1-one                                      | C <sub>26</sub> H <sub>25</sub> N <sub>3</sub> O <sub>4</sub>     |
| 170 | (E)-1-(3,4-dimethoxyphenyl)-3-(1-phenyl-3-(pyridin-4-yl)-4,5-dihydro-1H-pyrazol-4-yl)prop-2-en-1-one                                         | C <sub>25</sub> H <sub>23</sub> N <sub>3</sub> O <sub>3</sub>     |
| 171 | (E)-1-(2,5-dimethoxyphenyl)-3-(1-phenyl-3-(pyridin-4-yl)-4,5-dihydro-1H-pyrazol-4-yl)prop-2-en-1-one                                         | C <sub>25</sub> H <sub>23</sub> N <sub>3</sub> O <sub>3</sub>     |
| 172 | (E)-1-(2,4-dimethoxyphenyl)-3-(1-phenyl-3-(pyridin-4-yl)-4,5-dihydro-1H-pyrazol-4-yl)prop-2-en-1-one                                         | C <sub>25</sub> H <sub>23</sub> N <sub>3</sub> O <sub>3</sub>     |
| 173 | (E)-3-phenyl-1-(4-((1-phenyl-1H-tetrazol-5-yl)oxy)phenyl)prop-2-en-1-one                                                                     | C <sub>22</sub> H <sub>16</sub> N <sub>4</sub> O <sub>2</sub>     |
| 174 | (E)-3-(3,4-dimethoxyphenyl)-1-(4-((1-phenyl-1H-tetrazol-5-yl)oxy)phenyl)prop-2-en-1-one                                                      | C <sub>24</sub> H <sub>20</sub> N <sub>4</sub> O <sub>4</sub>     |
| 175 | (E)-1-(4-((1-phenyl-1H-tetrazol-5-yl)oxy)phenyl)-3-(3,4,5-trimethoxyphenyl)prop-2-en-1-one                                                   | C <sub>25</sub> H <sub>22</sub> N <sub>4</sub> O <sub>5</sub>     |
| 176 | (E)-3-(4-chlorophenyl)-1-(4-((1-phenyl-1H-tetrazol-5-yl)oxy)phenyl)prop-2-en-1-one                                                           | C <sub>22</sub> H <sub>15</sub> ClN <sub>4</sub> O <sub>2</sub>   |
| 177 | (E)-3-(2-bromophenyl)-1-(4-((1-phenyl-1H-tetrazol-5-yl)oxy)phenyl)prop-2-en-1-one                                                            | C <sub>22</sub> H <sub>15</sub> BrN <sub>4</sub> O <sub>2</sub>   |
| 178 | (E)-3-(4-bromophenyl)-1-(4-((1-phenyl-1H-tetrazol-5-yl)oxy)phenyl)prop-2-en-1-one                                                            | C <sub>22</sub> H <sub>15</sub> BrN <sub>4</sub> O <sub>2</sub>   |
| 179 | (E)-3-(4-fluorophenyl)-1-(4-((1-phenyl-1H-tetrazol-5-yl)oxy)phenyl)prop-2-en-1-one                                                           | C <sub>22</sub> H <sub>15</sub> FN <sub>4</sub> O <sub>2</sub>    |
| 180 | (E)-3-(2-nitrophenyl)-1-(4-((1-phenyl-1H-tetrazol-5-yl)oxy)phenyl)prop-2-en-1-one                                                            | C <sub>22</sub> H <sub>15</sub> N <sub>5</sub> O <sub>4</sub>     |
| 181 | (E)-3-(4-methoxyphenyl)-1-(5-methyl-2-(methylamino)thiazol-4-yl)prop-2-en-1-one                                                              | C <sub>15</sub> H <sub>16</sub> N <sub>2</sub> O <sub>2</sub> S   |
| 182 | (E)-1-(5-methyl-2-(methylamino)thiazol-4-yl)-3-(p-tolyl)prop-2-en-1-one                                                                      | C <sub>15</sub> H <sub>16</sub> N <sub>2</sub> OS                 |
| 183 | (E)-1-(5-methyl-2-(methylamino)thiazol-4-yl)-3-phenylprop-2-en-1-one                                                                         | C <sub>14</sub> H <sub>14</sub> N <sub>2</sub> OS                 |
| 184 | (E)-3-(4-fluorophenyl)-1-(5-methyl-2-(methylamino)thiazol-4-yl)prop-2-en-1-one                                                               | C <sub>14</sub> H <sub>13</sub> FN <sub>2</sub> OS                |
| 185 | (E)-3-(4-chlorophenyl)-1-(5-methyl-2-(methylamino)thiazol-4-yl)prop-2-en-1-one                                                               | C <sub>14</sub> H <sub>13</sub> ClN <sub>2</sub> OS               |
| 186 | (E)-3-(2,4-dichlorophenyl)-1-(5-methyl-2-(methylamino)thiazol-4-yl)prop-2-en-1-one                                                           | C <sub>14</sub> H <sub>12</sub> Cl <sub>2</sub> N <sub>2</sub> OS |
| 187 | (E)-1-phenyl-3-(4-(3-(4-(3,4,5-trimethoxyphenyl)thiazol-2-yl)-2,3-dihydroimidazo[1,2-a]pyridin-2-yl)phenyl)prop-2-en-1-one                   | C <sub>34</sub> H <sub>29</sub> N <sub>3</sub> O <sub>4</sub> S   |
| 188 | (E)-1-(3,4,5-trimethoxyphenyl)-3-(4-(3-(4-(3,4,5-trimethoxyphenyl)thiazol-2-yl)-2,3-dihydroimidazo[1,2-a]pyridin-2-yl)phenyl)prop-2-en-1-one | C <sub>37</sub> H <sub>35</sub> N <sub>3</sub> O <sub>7</sub> S   |



|     |                                                                                                                                           |                                                                   |
|-----|-------------------------------------------------------------------------------------------------------------------------------------------|-------------------------------------------------------------------|
| 189 | (E)-1-(3,5-dimethoxyphenyl)-3-(4-(3-(4-(3,4,5-trimethoxyphenyl)thiazol-2-yl)-2,3-dihydroimidazo[1,2-a]pyridin-2-yl)phenyl)prop-2-en-1-one | C <sub>36</sub> H <sub>33</sub> N <sub>3</sub> O <sub>6</sub> S   |
| 190 | (E)-1-(4-methoxyphenyl)-3-(4-(3-(4-(3,4,5-trimethoxyphenyl)thiazol-2-yl)-2,3-dihydroimidazo[1,2-a]pyridin-2-yl)phenyl)prop-2-en-1-one     | C <sub>35</sub> H <sub>31</sub> N <sub>3</sub> O <sub>5</sub> S   |
| 191 | (E)-1-(4-chlorophenyl)-3-(4-(3-(4-(3,4,5-trimethoxyphenyl)thiazol-2-yl)-2,3-dihydroimidazo[1,2-a]pyridin-2-yl)phenyl)prop-2-en-1-one      | C <sub>34</sub> H <sub>28</sub> ClN <sub>3</sub> O <sub>4</sub> S |
| 192 | (E)-1-(4-bromophenyl)-3-(4-(3-(4-(3,4,5-trimethoxyphenyl)thiazol-2-yl)-2,3-dihydroimidazo[1,2-a]pyridin-2-yl)phenyl)prop-2-en-1-one       | C <sub>34</sub> H <sub>28</sub> BrN <sub>3</sub> O <sub>4</sub> S |
| 193 | (E)-1-(4-nitrophenyl)-3-(4-(3-(4-(3,4,5-trimethoxyphenyl)thiazol-2-yl)-2,3-dihydroimidazo[1,2-a]pyridin-2-yl)phenyl)prop-2-en-1-one       | C <sub>34</sub> H <sub>28</sub> N <sub>4</sub> O <sub>6</sub> S   |
| 194 | (E)-1-(3,5-dinitrophenyl)-3-(4-(3-(4-(3,4,5-trimethoxyphenyl)thiazol-2-yl)-2,3-dihydroimidazo[1,2-a]pyridin-2-yl)phenyl)prop-2-en-1-one   | C <sub>34</sub> H <sub>27</sub> N <sub>5</sub> O <sub>8</sub> S   |
| 195 | (E)-4-(3-(4-(3-(4-(3,4,5-trimethoxyphenyl)thiazol-2-yl)-2,3-dihydroimidazo[1,2-a]pyridin-2-yl)phenyl)acryloyl)benzonitrile                | C <sub>35</sub> H <sub>28</sub> N <sub>4</sub> O <sub>4</sub> S   |
| 196 | (E)-1-(p-tolyl)-3-(4-(3-(4-(3,4,5-trimethoxyphenyl)thiazol-2-yl)-2,3-dihydroimidazo[1,2-a]pyridin-2-yl)phenyl)prop-2-en-1-one             | C <sub>35</sub> H <sub>31</sub> N <sub>3</sub> O <sub>4</sub> S   |
| 197 | (E)-2-((4-allyl-5-(4-methoxyphenyl)-4H-1,2,4-triazol-3-yl)thio)-N-(4-(3-(3,4,5-trimethoxyphenyl)acryloyl)phenyl)acetamide                 | C <sub>32</sub> H <sub>32</sub> N <sub>4</sub> O <sub>6</sub> S   |
| 198 | (E)-1-(3,4-dimethoxyphenyl)-3-(3-ethoxy-4-((1-(2-hydroxyphenyl)-1H-1,2,3-triazol-4-yl)methoxy)phenyl)prop-2-en-1-one                      | C <sub>28</sub> H <sub>27</sub> N <sub>3</sub> O <sub>6</sub>     |
| 199 | (E)-1-(4-bromophenyl)-3-(3-ethoxy-4-((1-(2-hydroxyphenyl)-1H-1,2,3-triazol-4-yl)methoxy)phenyl)prop-2-en-1-one                            | C <sub>26</sub> H <sub>22</sub> BrN <sub>3</sub> O <sub>4</sub>   |
| 200 | (E)-3-(3-ethoxy-4-((1-(2-hydroxyphenyl)-1H-1,2,3-triazol-4-yl)methoxy)phenyl)-1-(4-hydroxyphenyl)prop-2-en-1-one                          | C <sub>26</sub> H <sub>23</sub> N <sub>3</sub> O <sub>5</sub>     |
| 201 | (E)-1-(3,4-dimethoxyphenyl)-3-(3-ethoxy-4-((1-(2-hydroxy-4-methylphenyl)-1H-1,2,3-triazol-4-yl)methoxy)phenyl)prop-2-en-1-one             | C <sub>29</sub> H <sub>29</sub> N <sub>3</sub> O <sub>6</sub>     |
| 202 | (E)-1-(4-bromophenyl)-3-(3-ethoxy-4-((1-(2-hydroxy-4-methylphenyl)-1H-1,2,3-triazol-4-yl)methoxy)phenyl)prop-2-en-1-one                   | C <sub>27</sub> H <sub>24</sub> BrN <sub>3</sub> O <sub>4</sub>   |
| 203 | (E)-3-(3-ethoxy-4-((1-(2-hydroxy-4-methylphenyl)-1H-1,2,3-triazol-4-yl)methoxy)phenyl)-1-(3-hydroxyphenyl)prop-2-en-1-one                 | C <sub>27</sub> H <sub>25</sub> N <sub>3</sub> O <sub>5</sub>     |
| 204 | (E)-3-(4-((1-(4-chloro-2-hydroxyphenyl)-1H-1,2,3-triazol-4-yl)methoxy)-3-ethoxyphenyl)-1-(3,4-dimethoxyphenyl)prop-2-en-1-one             | C <sub>28</sub> H <sub>26</sub> ClN <sub>3</sub> O <sub>6</sub>   |
| 205 | (E)-1-(4-bromophenyl)-3-(4-((1-(4-chloro-2-hydroxyphenyl)-1H-1,2,3-triazol-4-yl)methoxy)-3-ethoxyphenyl)prop-2-en-1-one                   | C <sub>26</sub> H <sub>21</sub> BrClN <sub>3</sub> O <sub>4</sub> |
| 206 | (E)-3-(4-((1-(4-chloro-2-hydroxyphenyl)-1H-1,2,3-triazol-4-yl)methoxy)-3-ethoxyphenyl)-1-(3-hydroxyphenyl)prop-2-en-1-one                 | C <sub>26</sub> H <sub>22</sub> ClN <sub>3</sub> O <sub>5</sub>   |
