# Supplementary material for: Anticancer Activity of Natural and Synthetic Chalcones
Source: MDPI journal article supplement (doi:10.3390/ijms222111306), 2021-10-20
Supplement: s1 [file s1]

Table S1. Chemical structures of natural and synthetic chalcones with anticancer activity.

|   | Structure                                                                           | Chalcone derivative |
|---|-------------------------------------------------------------------------------------|---------------------|
| 1 | 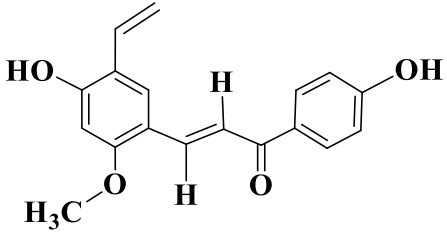   | Licochalcone A      |
| 2 |    | trans-chalcone      |
| 3 |    | Licochalcone B      |
| 4 |   | Licochalcone C      |
| 5 |  | Licochalcone D      |
| 6 |  | Xanthohumol         |
| 7 |  | Panduretin A        |

|                                                            |                                                                                     |                                                                                                                                                                                                                                                                                                                                                                                                                                                                                                                      |
|------------------------------------------------------------|-------------------------------------------------------------------------------------|----------------------------------------------------------------------------------------------------------------------------------------------------------------------------------------------------------------------------------------------------------------------------------------------------------------------------------------------------------------------------------------------------------------------------------------------------------------------------------------------------------------------|
| 8                                                          | 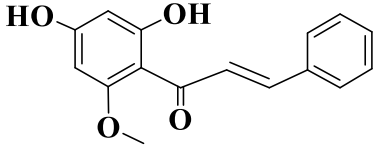   | Cardamonin                                                                                                                                                                                                                                                                                                                                                                                                                                                                                                           |
| 9                                                          |    | Lonchocarpin                                                                                                                                                                                                                                                                                                                                                                                                                                                                                                         |
| 10                                                         |    | Butein                                                                                                                                                                                                                                                                                                                                                                                                                                                                                                               |
| 11                                                         |    | Isoliquiritigenin                                                                                                                                                                                                                                                                                                                                                                                                                                                                                                    |
| 12                                                         |   | Flavokawain                                                                                                                                                                                                                                                                                                                                                                                                                                                                                                          |
| 13                                                         |  | Isobavachalcone                                                                                                                                                                                                                                                                                                                                                                                                                                                                                                      |
| Xanthohumol acyl derivatives                               |                                                                                     |                                                                                                                                                                                                                                                                                                                                                                                                                                                                                                                      |
| 14-20                                                      |  | <p>14. <math>R_1 = \text{COCH}_3</math>, <math>R_2 = \text{H}</math>;<br/> 15. <math>R_1, R_2 = \text{COCH}_3</math>;<br/> 16. <math>R_1 = \text{CO}(\text{CH}_2)_8\text{CH}_3</math>, <math>R_2 = \text{H}</math>;<br/> 17. <math>R_1 = \text{CO}(\text{CH}_2)_{10}\text{CH}_3</math>, <math>R_2 = \text{H}</math>;<br/> 18. <math>R_1, R_2 = \text{CO}(\text{CH}_2)_{10}\text{CH}_3</math>;<br/> 19. <math>R_1 = \text{COC}(\text{CH}_3)_3</math>;<br/> 20. <math>R_1, R_2 = \text{COC}(\text{CH}_3)_3</math>.</p> |
| Xanthohumol derivatives with cyclized prenyl group (21-26) |                                                                                     |                                                                                                                                                                                                                                                                                                                                                                                                                                                                                                                      |
| 21                                                         |  |                                                                                                                                                                                                                                                                                                                                                                                                                                                                                                                      |

|                                                     |  |     |     |
|-----------------------------------------------------|--|-----|-----|
| 22                                                  |  |     |     |
| 23                                                  |  |     |     |
| 24                                                  |  |     |     |
| 25                                                  |  |     |     |
| 26                                                  |  |     |     |
| Chalcone derivatives containing diaryl ether moiety |  |     |     |
| 27-42                                               |  | Ar  | 28. |
|                                                     |  | 27. | 29. |
|                                                     |  | 29. | 30. |
|                                                     |  | 31. | 32. |
|                                                     |  | 33. | 34. |
|                                                     |  |     |     |

|                                                    |                                                                                                                                                                           |                                                                                                                                                                                                                                                                                                                                                                                                                                                                                                                                                                                                                                                                                                                                                                       |                                                                                         |
|----------------------------------------------------|---------------------------------------------------------------------------------------------------------------------------------------------------------------------------|-----------------------------------------------------------------------------------------------------------------------------------------------------------------------------------------------------------------------------------------------------------------------------------------------------------------------------------------------------------------------------------------------------------------------------------------------------------------------------------------------------------------------------------------------------------------------------------------------------------------------------------------------------------------------------------------------------------------------------------------------------------------------|-----------------------------------------------------------------------------------------|
|                                                    |                                                                                                                                                                           | 35. 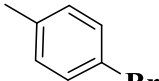                                                                                                                                                                                                                                                                                                                                                                                                                                                                                                                                                                                                                                                                                | 36.  |
|                                                    |                                                                                                                                                                           | 37.                                                                                                                                                                                                                                                                                                                                                                                                                                                                                                                                                                                                                                                                                 | 38.  |
|                                                    |                                                                                                                                                                           | 39.                                                                                                                                                                                                                                                                                                                                                                                                                                                                                                                                                                                                                                                                                 | 40.  |
|                                                    |                                                                                                                                                                           | 41.                                                                                                                                                                                                                                                                                                                                                                                                                                                                                                                                                                                                                                                                                 | 42.  |
| Chalcone derivatives containing sulfonamide moiety |                                                                                                                                                                           |                                                                                                                                                                                                                                                                                                                                                                                                                                                                                                                                                                                                                                                                                                                                                                       |                                                                                         |
| 43-54                                              | <br> | 43-48 R <sub>2</sub> -43. H; 44.Cl; 45.CH <sub>3</sub> ;<br>46.OCH <sub>3</sub> , 47.R <sub>1</sub> ,R <sub>2</sub> ,R <sub>3</sub> =OCH <sub>3</sub> ;<br>48. R <sub>2</sub> ,R <sub>3</sub> =CH <sub>2</sub> O <sub>2</sub><br><br>49-54 R <sub>2</sub> -49. H; 50.Cl; 51.CH <sub>3</sub> ;<br>52.OCH <sub>3</sub> ; 53.R <sub>1</sub> ,R <sub>2</sub> ,R <sub>3</sub> =OCH <sub>3</sub> ; 54.<br>R <sub>2</sub> ,R <sub>3</sub> =CH <sub>2</sub> O <sub>2</sub>                                                                                                                                                                                                                                                                                                    |                                                                                         |
| 55-62                                              |                                                                                        | 55.R=H; 56.R=2-F; 57.R=3-F; 58.R=4-F;<br>59.R=2,3-diF; 60.R=2,4-diF; 61.R=2,5-diF; 62.R=3,4-diF                                                                                                                                                                                                                                                                                                                                                                                                                                                                                                                                                                                                                                                                       |                                                                                         |
| Aminochalcones                                     |                                                                                                                                                                           |                                                                                                                                                                                                                                                                                                                                                                                                                                                                                                                                                                                                                                                                                                                                                                       |                                                                                         |
| 63-80                                              |                                                                                        | 63.R <sub>1</sub> =2-NH <sub>2</sub> , R <sub>2</sub> =H;<br>64.R <sub>1</sub> =2-NH <sub>2</sub> , R <sub>2</sub> =4-CH <sub>2</sub> -CH <sub>3</sub> ;<br>65.R <sub>1</sub> =2-NH <sub>2</sub> , R <sub>2</sub> =4-COOH;<br>66.R <sub>1</sub> =2-NH <sub>2</sub> , R <sub>2</sub> =4-NO <sub>2</sub> ;<br>67.R <sub>1</sub> =2-NH <sub>2</sub> , R <sub>2</sub> =4-OCH <sub>2</sub> C <sub>6</sub> H <sub>5</sub> ;<br>68.R <sub>1</sub> =2-NH <sub>2</sub> , R <sub>2</sub> =3-OMe-4OCH <sub>2</sub> C <sub>6</sub> H <sub>5</sub> ;<br>69.R <sub>1</sub> =3-NH <sub>2</sub> , R <sub>2</sub> =H;<br>70.R <sub>1</sub> =3-NH <sub>2</sub> , R <sub>2</sub> =4-CH <sub>2</sub> -CH <sub>3</sub> ;<br>71.R <sub>1</sub> =3-NH <sub>2</sub> , R <sub>2</sub> =4-COOH; |                                                                                         |

|        |                                                                                     |                                                                                                                                                                                                                                                                                                                                                                                                                                                                                                                                                                                                                                                                                                                                                                                       |
|--------|-------------------------------------------------------------------------------------|---------------------------------------------------------------------------------------------------------------------------------------------------------------------------------------------------------------------------------------------------------------------------------------------------------------------------------------------------------------------------------------------------------------------------------------------------------------------------------------------------------------------------------------------------------------------------------------------------------------------------------------------------------------------------------------------------------------------------------------------------------------------------------------|
|        |                                                                                     | <p>72.R<sub>1</sub>=3-NH<sub>2</sub>, R<sub>2</sub>=4-NO<sub>2</sub>;<br/> 73.R<sub>1</sub>=3-NH<sub>2</sub>, R<sub>2</sub>=4-OCH<sub>2</sub>C<sub>6</sub>H<sub>5</sub>;<br/> 74.R<sub>1</sub>=3-NH<sub>2</sub>, R<sub>2</sub>=3-OMe-4OCH<sub>2</sub>C<sub>6</sub>H<sub>5</sub>;<br/> 75.R<sub>1</sub>=4-NH<sub>2</sub>, R<sub>2</sub>=H;<br/> 76.R<sub>1</sub>=4-NH<sub>2</sub>, R<sub>2</sub>=4-CH<sub>2</sub>-CH<sub>3</sub>;<br/> 77.R<sub>1</sub>=4-NH<sub>2</sub>, R<sub>2</sub>=4-COOH;<br/> 78.R<sub>1</sub>=4-NH<sub>2</sub>, R<sub>2</sub>=4-NO<sub>2</sub>;<br/> 79.R<sub>1</sub>=4-NH<sub>2</sub>, R<sub>2</sub>=4-OCH<sub>2</sub>C<sub>6</sub>H<sub>5</sub>;<br/> 80.R<sub>1</sub>=4-NH<sub>2</sub>, R<sub>2</sub>=3-OMe-4OCH<sub>2</sub>C<sub>6</sub>H<sub>5</sub>;</p> |
| 81-91  | 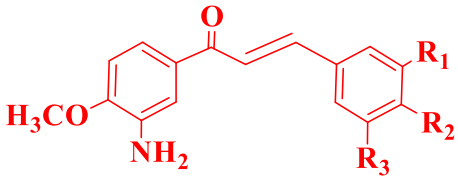   | <p>81.R<sub>1</sub>=R<sub>2</sub>=R<sub>3</sub>=H;<br/> 82.R<sub>1</sub>=R<sub>3</sub>=H, R<sub>2</sub>=OCH<sub>3</sub>;<br/> 83.R<sub>1</sub>=R<sub>2</sub>=H, R<sub>3</sub>=OCH<sub>3</sub>;<br/> 84.R<sub>1</sub>=R<sub>3</sub>=OCH<sub>3</sub>, R<sub>2</sub>=H;<br/> 85.R<sub>1</sub>=H, R<sub>2</sub>=R<sub>3</sub>=OCH<sub>3</sub>;<br/> 86.R<sub>1</sub>=R<sub>2</sub>=R<sub>3</sub>=OCH<sub>3</sub>;</p>                                                                                                                                                                                                                                                                                                                                                                     |
|        |    | <p>87.R<sub>1</sub>=R<sub>7</sub>=H; R<sub>2</sub>=R<sub>3</sub>=R<sub>4</sub>=R<sub>6</sub>=OCH<sub>3</sub>, R<sub>5</sub>=NH<sub>2</sub>;<br/> 88.R<sub>1</sub>=R<sub>5</sub>=R<sub>7</sub>=H, R<sub>2</sub>=R<sub>3</sub>=R<sub>4</sub>=OCH<sub>3</sub>, R<sub>6</sub>=NH<sub>2</sub>;<br/> 89.R<sub>1</sub>=R<sub>4</sub>=OCH<sub>3</sub>, R<sub>2</sub>=R<sub>3</sub>=R<sub>5</sub>=R<sub>7</sub>=H, R<sub>6</sub>=NH<sub>2</sub>;<br/> 90.R<sub>1</sub>=R<sub>4</sub>=R<sub>6</sub>=OCH<sub>3</sub>, R<sub>2</sub>=R<sub>3</sub>=R<sub>7</sub>=H, R<sub>5</sub>=NH<sub>2</sub>;</p>                                                                                                                                                                                             |
|        |  | 91                                                                                                                                                                                                                                                                                                                                                                                                                                                                                                                                                                                                                                                                                                                                                                                    |
| 92-103 |  | <p>92.R<sub>1</sub>=R<sub>2</sub>=H;<br/> 93.R<sub>1</sub>=n-propyl, R<sub>2</sub>=H;<br/> 94.R<sub>1</sub>=n-butyl, R<sub>2</sub>=H;</p> <p>95.R<sub>1</sub>= , R<sub>2</sub>=H;</p> <p>96.R<sub>1</sub>= , R<sub>2</sub>=H;</p> <p>97.R<sub>1</sub>= , R<sub>2</sub>=H;</p> <p>98.R<sub>1</sub>=CH<sub>3</sub>, R<sub>2</sub>=H;</p> <p>99.R<sub>1</sub>=R<sub>2</sub>=  ;</p>                                                     |

|                                 |                                                                                     |                                                                                                                                                                                                                                                                                                                                                                                                                                                                                                                                                                                                                                                                                                                                                                                                                                                                                                                                                                                                                                                                                                                                                                                                                                                                                                                                                                                                                                                                                                                                                                                                                 |
|---------------------------------|-------------------------------------------------------------------------------------|-----------------------------------------------------------------------------------------------------------------------------------------------------------------------------------------------------------------------------------------------------------------------------------------------------------------------------------------------------------------------------------------------------------------------------------------------------------------------------------------------------------------------------------------------------------------------------------------------------------------------------------------------------------------------------------------------------------------------------------------------------------------------------------------------------------------------------------------------------------------------------------------------------------------------------------------------------------------------------------------------------------------------------------------------------------------------------------------------------------------------------------------------------------------------------------------------------------------------------------------------------------------------------------------------------------------------------------------------------------------------------------------------------------------------------------------------------------------------------------------------------------------------------------------------------------------------------------------------------------------|
|                                 |                                                                                     | <p>100. <math>R_1 = </math> 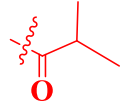, <math>R_2 = H</math>;</p> <p>101. <math>R_1 = </math> , <math>R_2 = H</math>;</p> <p>102. <math>R_1 = </math> , <math>R_2 = H</math>;</p> <p>103. <math>R_1 = </math> , <math>R_2 = H</math>;</p>                                                                                                                                                                                                                                                                                                                                                                                                                                                                                                                                                                                                                                                                                                                                                                                                                                                                                                                                                                                                                                         |
| Imidazole –chalcone derivatives |                                                                                     |                                                                                                                                                                                                                                                                                                                                                                                                                                                                                                                                                                                                                                                                                                                                                                                                                                                                                                                                                                                                                                                                                                                                                                                                                                                                                                                                                                                                                                                                                                                                                                                                                 |
| 104-121                         |    | <p>104. <math>R_2 = Br</math>, <math>R_1 = R_3 = H</math>, <math>R_4 = SMe</math>;</p> <p>105. <math>R_2 = F</math>, <math>R_1 = R_3 = H</math>, <math>R_4 = SMe</math>;</p> <p>106. <math>R_2 = Cl</math>, <math>R_1 = R_3 = H</math>, <math>R_4 = SMe</math>;</p> <p>107. <math>R_2 = NO_2</math>, <math>R_1 = R_3 = H</math>, <math>R_4 = SMe</math>;</p> <p>108. <math>R_2 = OPh</math>, <math>R_1 = R_3 = H</math>, <math>R_4 = SMe</math>;</p> <p>109. <math>R_2 = CH_3</math>, <math>R_1 = R_3 = H</math>, <math>R_4 = SMe</math>;</p> <p>110. <math>R_1, R_2 = Ph</math>, <math>R_3 = H</math>, <math>R_4 = SMe</math>;</p> <p>111. <math>R_2 = OCH_3</math>, <math>R_1 = R_3 = H</math>, <math>R_4 = SMe</math>;</p> <p>112. <math>R_1 = R_2 = R_3 = OCH_3</math>, <math>R_4 = SMe</math>;</p> <p>113. <math>R_2 = Br</math>, <math>R_1 = R_3 = H</math>, <math>R_4 = SEt</math>;</p> <p>114. <math>R_2 = F</math>, <math>R_1 = R_3 = H</math>, <math>R_4 = SEt</math>;</p> <p>115. <math>R_2 = Cl</math>, <math>R_1 = R_3 = H</math>, <math>R_4 = SEt</math>;</p> <p>116. <math>R_2 = NO_2</math>, <math>R_1 = R_3 = H</math>, <math>R_4 = SEt</math>;</p> <p>117. <math>R_2 = OPh</math>, <math>R_1 = R_3 = H</math>, <math>R_4 = SEt</math>;</p> <p>118. <math>R_2 = CH_3</math>, <math>R_1 = R_3 = H</math>, <math>R_4 = SEt</math>;</p> <p>119. <math>R_1, R_2 = Ph</math>, <math>R_3 = H</math>, <math>R_4 = SEt</math>;</p> <p>120. <math>R_2 = OCH_3</math>, <math>R_1 = R_3 = H</math>, <math>R_4 = SEt</math>;</p> <p>121. <math>R_1 = R_2 = R_3 = OCH_3</math>, <math>R_4 = SEt</math>;</p> |
| Pyrazole-chalcone derivatives   |                                                                                     |                                                                                                                                                                                                                                                                                                                                                                                                                                                                                                                                                                                                                                                                                                                                                                                                                                                                                                                                                                                                                                                                                                                                                                                                                                                                                                                                                                                                                                                                                                                                                                                                                 |
| 122-130                         |  | <p>122. <math>R = </math>  123. <math>R = </math> </p> <p>124. <math>R = </math>  125. <math>R = </math> </p> <p>126. <math>R = </math>  127. <math>R = </math> </p> <p>128. <math>R = </math>  129. <math>R = </math> </p>                                                                                                                                                                                                                                                                                                                                                                                                                                                                                                                                                                                                                                                                             |

|         |                                                                                   |                                                                                                                                                                                                                                                                                                                                                                                                                                                                                                                                                                                                                                                                                                                                                                                                                                                                                                                                                                                                                                                                                                                                                                                                                                                                                                                                                                                                                                                                                                                                                                                                                                                                                                                                                                                                                                                                                                                                                       |
|---------|-----------------------------------------------------------------------------------|-------------------------------------------------------------------------------------------------------------------------------------------------------------------------------------------------------------------------------------------------------------------------------------------------------------------------------------------------------------------------------------------------------------------------------------------------------------------------------------------------------------------------------------------------------------------------------------------------------------------------------------------------------------------------------------------------------------------------------------------------------------------------------------------------------------------------------------------------------------------------------------------------------------------------------------------------------------------------------------------------------------------------------------------------------------------------------------------------------------------------------------------------------------------------------------------------------------------------------------------------------------------------------------------------------------------------------------------------------------------------------------------------------------------------------------------------------------------------------------------------------------------------------------------------------------------------------------------------------------------------------------------------------------------------------------------------------------------------------------------------------------------------------------------------------------------------------------------------------------------------------------------------------------------------------------------------------|
|         |                                                                                   | 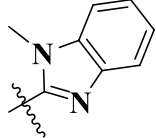<br>130.R=                                                                                                                                                                                                                                                                                                                                                                                                                                                                                                                                                                                                                                                                                                                                                                                                                                                                                                                                                                                                                                                                                                                                                                                                                                                                                                                                                                                                                                                                                                                                                                                                                                                                                                                                                                                                                                                         |
| 131-172 |  | 131.Ar=  , R=  ;<br>132.Ar=  , R=  ;<br>133.Ar=  , R=  ;<br>134.Ar=  , R=  ;<br>135.Ar=  , R=  ;<br>136.Ar=  , R=  ;<br>137.Ar=  , R=  ;<br>138.Ar=  , R=  ;<br>139.Ar=  , R=  ;<br>140.Ar=  , R=  ; |

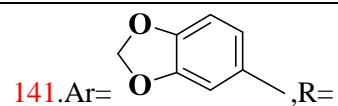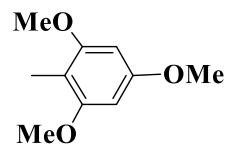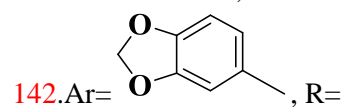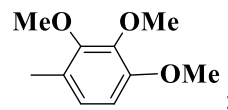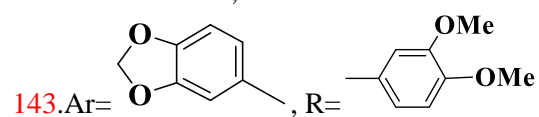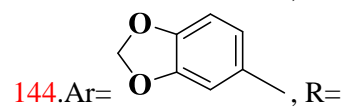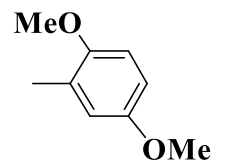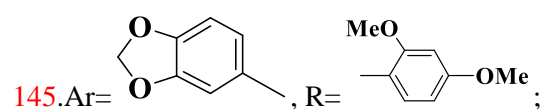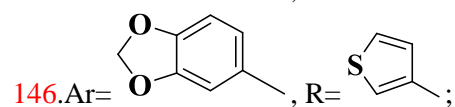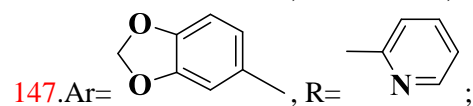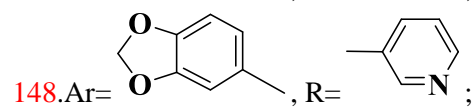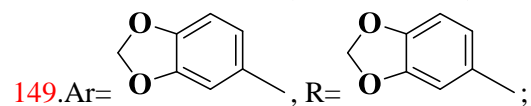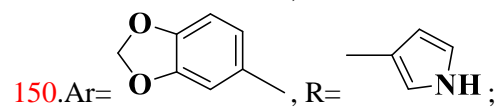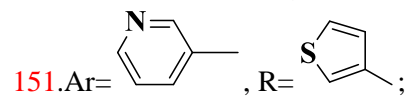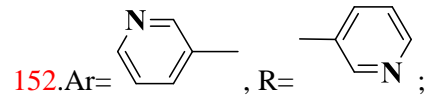



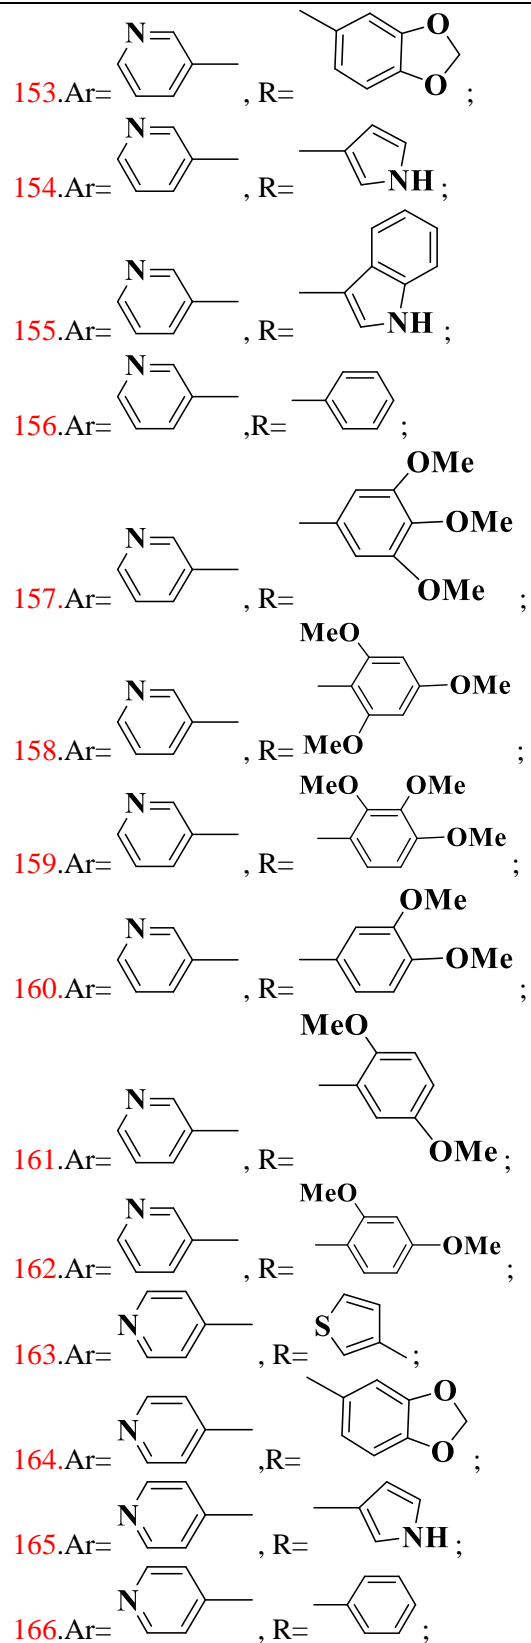

|                                |                                                                                     |                                                                                                                                                                                                                                                                                                                                                                                                                                                                                                                                                                                                                                                                                                                                                                                                                                                                                                                                                                                                                                                                                                                                                                                                                                                                                  |
|--------------------------------|-------------------------------------------------------------------------------------|----------------------------------------------------------------------------------------------------------------------------------------------------------------------------------------------------------------------------------------------------------------------------------------------------------------------------------------------------------------------------------------------------------------------------------------------------------------------------------------------------------------------------------------------------------------------------------------------------------------------------------------------------------------------------------------------------------------------------------------------------------------------------------------------------------------------------------------------------------------------------------------------------------------------------------------------------------------------------------------------------------------------------------------------------------------------------------------------------------------------------------------------------------------------------------------------------------------------------------------------------------------------------------|
|                                |                                                                                     | <p> 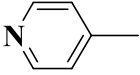  <br/> <b>167.</b>Ar= , R= ; </p> <p>   <br/> <b>168.</b>Ar= , R= ; </p> <p>   <br/> <b>169.</b>Ar= , R= ; </p> <p>   <br/> <b>170.</b>Ar= , R= ; </p> <p>   <br/> <b>171.</b>Ar= , R= ; </p> <p>   <br/> <b>172.</b>Ar= , R= ; </p> |
| Tetrazole-chalcone derivatives |                                                                                     |                                                                                                                                                                                                                                                                                                                                                                                                                                                                                                                                                                                                                                                                                                                                                                                                                                                                                                                                                                                                                                                                                                                                                                                                                                                                                  |
| <b>173-180</b>                 |  | <b>173.</b> R=H; <b>174.</b> R=3,4-(OCH <sub>3</sub> ) <sub>2</sub> ; <b>175.</b> R=3,4,5-(OCH <sub>3</sub> ) <sub>3</sub> ; <b>176.</b> R=4-Cl; <b>177.</b> R=2-Br; <b>178.</b> 4-Br; <b>179.</b> R=4-F; <b>180.</b> R=2-NO <sub>2</sub>                                                                                                                                                                                                                                                                                                                                                                                                                                                                                                                                                                                                                                                                                                                                                                                                                                                                                                                                                                                                                                        |
| Thiazole-chalcone derivatives  |                                                                                     |                                                                                                                                                                                                                                                                                                                                                                                                                                                                                                                                                                                                                                                                                                                                                                                                                                                                                                                                                                                                                                                                                                                                                                                                                                                                                  |
| <b>181-186</b>                 |  | <b>181.</b> R=4-OCH <sub>3</sub> ; <b>182.</b> R=4-CH <sub>3</sub> ; <b>183.</b> R=H; <b>184.</b> R=4-F; <b>185.</b> R=4-Cl; <b>186.</b> R=2,4-diCl                                                                                                                                                                                                                                                                                                                                                                                                                                                                                                                                                                                                                                                                                                                                                                                                                                                                                                                                                                                                                                                                                                                              |
